# Supplementary material
Source: PubMed Central journal article supplement (PMC3118652)
Supplement: Supp_Data.pdf [file Supp_Data.pdf]

# Supplementary Data

## Supplementary Information Regarding Mitochondrial Reactive Oxygen Species Measurements

It is important to note that the dichlorodihydrofluorescein diacetate assay has limitations and lacks some of the specificities of other assays such as electron paramagnetic resonance spectroscopy- or high-performance liquid chromatography-based methods (1). With this said, however, the nature of the reactive species most likely being formed and detected in our isolated mitochondria-based assay is hydrogen peroxide formed from the enzymatic and/or nonenzymatic dismutation of superoxide that is generated as a byproduct of electron transport. Approximately, 2%–5% of electrons “leak” from the respiratory chain complexes (I and III) to molecular O<sub>2</sub> to form superoxide and subsequently hydrogen peroxide. Note that studies were performed using isolated mitochondria in the presence of the oxidizable substrate succinate. Mitochondria were extensively washed (four wash steps); therefore, contaminating nitric oxide (NO) synthase would be minimal. Therefore, we do not anticipate NO and ensuing peroxynitrite formation. Also, assays were done in the absence of NO

synthase cofactors and substrates (*e.g.*, no L-arginine); thus, we would not expect NO generation. Together, this supports hydrogen peroxide as the reactive oxygen species (ROS) agent. This is further supported as ROS measurements were membrane potential sensitive (*i.e.*, ROS decreased by treatment with the uncoupler FCCP).

## Reference

1. Tarpey MM, Wink DA, and Grisham MB. Methods for detection of reactive metabolites of oxygen and nitrogen: in vitro and in vivo considerations. *Am J Physiol Regul Integr Comp Physiol* 286: R431–R444, 2004.

### Abbreviations Used

FCCP = carbonyl cyanide 4-(trifluoromethoxy)-phenylhydrazone  
NO = nitric oxide  
ROS = reactive oxygen species

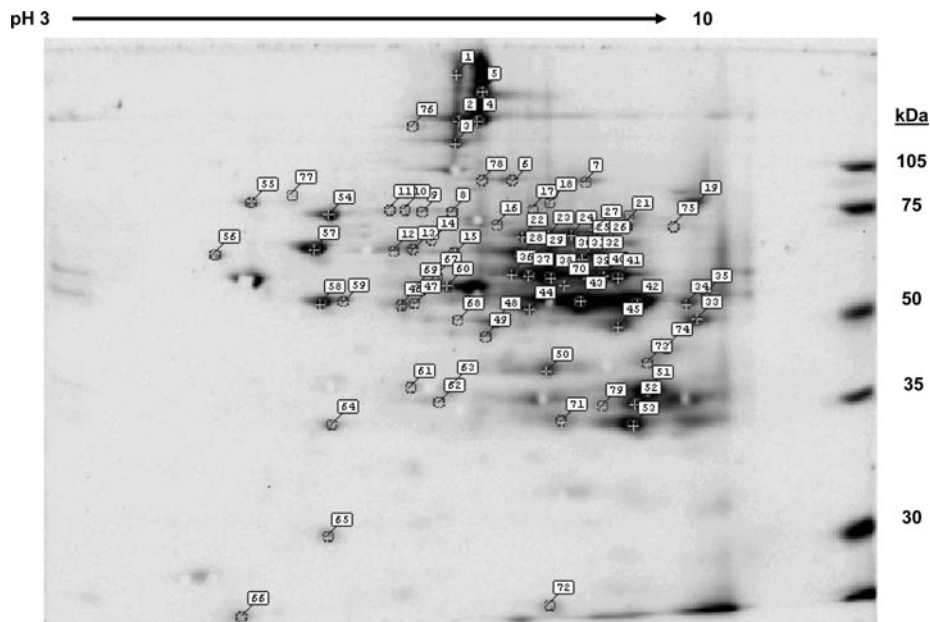

**SUPPLEMENTARY FIG. S1. Master map gel of proteins identified by mass spectrometry.** See Supplementary Table S1 for protein IDs. Note that this gel and the table do not contain proteins that were altered as a consequence of high-fat diet. Information regarding the proteins that were altered as a consequence of a high-fat diet is included within the main body of the manuscript in Figure 4 and Tables 2 and 3.

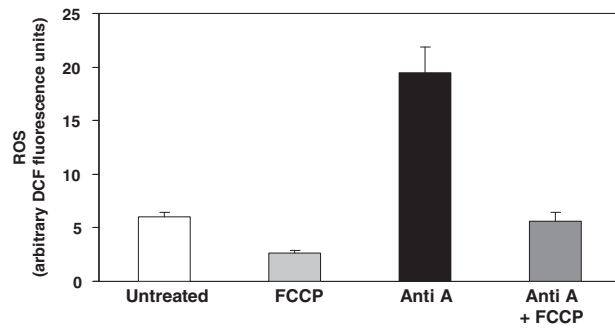

**SUPPLEMENTARY FIG. S2. Mitochondrial ROS production in the absence and presence of antimycinA and FCCP.** Mitochondria were incubated using conditions described in the Methods section to detect ROS production using 2',7'-dichlorodihydrofluorescein diacetate. Succinate (0.2mM) was added as the oxidizable substrate to initiate respiration and establish membrane potential. AntimycinA (Anti A) was added at a final concentration of 15  $\mu$ M to stimulate ROS production at complex III and FCCP (1  $\mu$ M) was added to uncouple mitochondria and dissipate the mitochondrial membrane potential. After 60 min of incubation, dichlorofluorescein fluorescence was measured at excitation/emissions wavelengths of 488/525 nm, respectively. Data represent mean + standard error of the mean for  $n = 3-6$  animals per treatment. Key *post hoc* statistical analyses: untreated *versus* antimycin,  $p < 0.0001$ ; untreated *versus* FCCP,  $p = 0.012$ ; antimycin *versus* Antimycin + FCCP,  $p < 0.0001$ ; FCCP *versus* antimycin + FCCP,  $p = 0.18$ . ROS, reactive oxygen species.

(Supplementary Table follows →)

SUPPLEMENTARY TABLE S1. GLOBAL MOUSE LIVER MITOCHONDRIAL PROTEOME—LISTING OF PROTEINS UNAFFECTED BY A HIGH-FAT DIET

| Spot no. | Protein                                                                           | Mass (kDa) | MOWSE score | Accession no. |
|----------|-----------------------------------------------------------------------------------|------------|-------------|---------------|
| 1        | Pyruvate carboxylase, mitochondrial precursor (pyruvic carboxylase)               | 130        | 149         | gi_94410786   |
| 2        | Unnamed protein product                                                           | 99.7       | 149         | gi_74201196   |
| 3        | Carbamoyl-phosphate synthetase 1 isoform 1                                        | 164.5      | 104         | gi_82879179   |
| 4        | Pyruvate carboxylase                                                              | 129.6      | 105         | gi_6679237    |
| 5        | Carbamoyl-phosphate synthetase 1 isoform 1                                        | 164.5      | 161         | gi_82879179   |
| 6        | Carbamoyl-phosphate synthetase 1 isoform 1                                        | 164.5      | 134         | gi_82879179   |
| 7        | Dimethylglycine dehydrogenase precursor                                           | 97.2       | 111         | gi_21311901   |
|          | Aconitase, mitochondrial ( <i>Rattus norvegicus</i> )                             | 85.4       | 101         | gi_40538860   |
|          | Unnamed protein product                                                           | 85.3       | 101         | gi_74188189   |
|          | Aconitase, mitochondrial                                                          | 85.4       | 100         | gi_18079339   |
| 8        | Propionyl-Coenzyme A carboxylase, alpha polypeptide                               | 79.9       | 116         | gi_21450241   |
| 9        | Glycerol-3-phosphate dehydrogenase                                                | 80.9       | 119         | gi_1339938    |
| 10       | Trap1 protein                                                                     | 80.0       | 119         | gi_13879408   |
| 11       | Tumor necrosis factor type 1 receptor-associated protein ( <i>R. norvegicus</i> ) | 80.4       | 93          | gi_84781723   |
| 12       | TNF receptor-associated protein 1                                                 | 80.2       | 65          | gi_13385998   |
|          | Protein disulfide-isomerase A3 precursor (disulfide isomerase ER-60)              | 56.6       | 100         | gi_1352384    |
|          | (ERp60) ( <i>R. norvegicus</i> )                                                  |            |             |               |
| 13       | Unnamed protein product                                                           | 56.7       | 100         | gi_26353794   |
| 14       | Protein disulfide isomerase associated 3                                          | 56.6       | 99          | gi_112293264  |
| 15       | Epoxide hydrolase (EC 3.3.2.3)                                                    | 62.5       | 112         | gi_477004     |
| 16       | 2-Hydroxyphytanoyl-CoA lyase                                                      | 63.6       | 102         | gi_31560355   |
| 17       | Aldehyde dehydrogenase family 7, member A1                                        | 55.6       | 105         | gi_20070418   |
| 18       | Butyryl Coenzyme A synthetase 1                                                   | 64.7       | 95          | gi_16905127   |
| 19       | Acyl-CoA synthetase long-chain family member 1                                    | 77.9       | 95          | gi_31560705   |
| 20       | Methylcrotonoyl-CoA carboxylase subunit alpha, mitochondrial precursor            | 79.3       | 97          | gi_20138697   |
| 21       | Peroxisomal bifunctional enzyme                                                   | 78.2       | 100         | gi_17366737   |
| 22       | Unidentified                                                                      | —          | —           | —             |
| 23       | Programmed cell death 8                                                           | 66.7       | 115         | gi_6755004    |
| 24       | Efdh protein                                                                      | 61.1       | 114         | gi_34784638   |
| 25       | Large subunit GTPase 1 homolog ( <i>R. norvegicus</i> )                           | 74.4       | 85          | gi_61740615   |
| 26       | Unnamed protein product                                                           | 73.3       | 55          | gi_74203215   |
| 27       | Large subunit GTPase 1 homolog                                                    | 73.1       | 54          | gi_30017373   |
| 28       | Sterol carrier protein 2, liver                                                   | 59.1       | 61          | gi_45476581   |
| 29       | Sterol carrier protein 2, liver                                                   | 59.1       | 107         | gi_45476581   |
| 30       | Sterol carrier protein 2, liver                                                   | 59.1       | 101         | gi_45476581   |
| 31       | Acyl-Coenzyme A dehydrogenase, very long chain                                    | 70.1       | 125         | gi_23956084   |
| 32       | Aldehyde dehydrogenase family 6, subfamily A1                                     | 57.9       | 149         | gi_19527258   |
| 33       | Aldh6a1 protein                                                                   | 49.6       | 106         | gi_21410418   |
| 34       | Unnamed protein product                                                           | 59.7       | 96          | gi_74223714   |
| 35       | Catalase                                                                          | 59.7       | 79          | gi_115704     |

(continued)

SUPPLEMENTARY TABLE S1. CONTINUED

| Spot no. | Protein                                                                                                                      | Mass (kDa) | MOWSE score | Accession no. |
|----------|------------------------------------------------------------------------------------------------------------------------------|------------|-------------|---------------|
| 31       | Unnamed protein product                                                                                                      | 59.7       | 93          | gi 74223714   |
|          | Catalase                                                                                                                     | 59.7       | 74          | gi 115704     |
| 32       | Unnamed protein product                                                                                                      | 59.7       | 140         | gi 74223714   |
|          | Catalase                                                                                                                     | 59.7       | 115         | gi 115704     |
| 33       | Unnamed protein product                                                                                                      | 40.8       | 101         | gi 74213886   |
|          | Aspartate aminotransferase, mitochondrial precursor (Transaminase A)                                                         | 47.4       | 95          | gi 94410786   |
| 34       | Unnamed protein product                                                                                                      | 46.9       | 102         | gi 12841359   |
|          | Ubiquinol cytochrome c reductase core protein 2                                                                              | 48.2       | 101         | gi 22267442   |
| 35       | Aspartate aminotransferase, mitochondrial precursor (Transaminase A)                                                         | 47.4       | 89          | gi 94410786   |
| 36       | Glutamate dehydrogenase 1, mitochondrial precursor                                                                           | 54.2       | 123         | gi 94396788   |
| 37       | Glutamate dehydrogenase 1, mitochondrial precursor                                                                           | 54.2       | 113         | gi 94396788   |
| 38       | Glutamate dehydrogenase 1, mitochondrial precursor                                                                           | 54.2       | 132         | gi 94396788   |
| 39       | ATP synthase, H+ transporting, mitochondrial F1 complex, alpha subunit, isoform 1                                            | 59.7       | 130         | gi 6680748    |
| 40       | Unnamed protein product                                                                                                      | 55.9       | 102         | gi 74146998   |
|          | ATP synthase, H+ transporting, mitochondrial F1 complex, alpha subunit, isoform 1                                            | 59.7       | 99          | gi 6680748    |
| 41       | Unnamed protein product                                                                                                      | 55.9       | 124         | gi 74146998   |
|          | ATP synthase, H+ transporting, mitochondrial F1 complex, alpha subunit, isoform 1                                            | 59.7       | 120         | gi 6680748    |
| 42       | Acetyl-Coenzyme A acyltransferase 2 (mitochondrial 3-oxoacyl-Coenzyme A thiolase)                                            | 41.8       | 128         | gi 29126205   |
| 43       | 3-Hydroxy-3-methylglutaryl-Coenzyme A synthase 2                                                                             | 56.8       | 103         | gi 31560689   |
| 44       | Unnamed protein product                                                                                                      | 58.1       | 103         | gi 74226121   |
|          | Sbno1 protein                                                                                                                | 55.5       | 80          | gi 117938837  |
| 45       | Acetyl-Coenzyme A acetyltransferase 1 precursor                                                                              | 44.8       | 86          | gi 21450129   |
| 46       | Ornithine aminotransferase                                                                                                   | 48.3       | 113         | gi 8393866    |
| 47       | Small GTPase homolog                                                                                                         | 44.1       | 87          | gi 114145487  |
| 48       | Chain A, crystal structure of rat short chain acyl-CoA dehydrogenase complexed with acetoacetyl-CoA ( <i>R. norvegicus</i> ) | 42.1       | 104         | gi 20150494   |
| 49       | Acyl-Coenzyme A dehydrogenase, short chain                                                                                   | 44.9       | 83          | gi 31982522   |
|          | Unnamed protein product                                                                                                      | 46.2       | 123         | gi 12836655   |
| 50       | Isovaleryl coenzyme A dehydrogenase                                                                                          | 46.3       | 122         | gi 9789985    |
|          | Unnamed protein product                                                                                                      | 46.2       | 123         | gi 12836655   |
| 51       | Isovaleryl coenzyme A dehydrogenase                                                                                          | 46.3       | 122         | gi 9789985    |
|          | Uricase precursor (E.C. 1.7.3.3) ( <i>R. norvegicus</i> )                                                                    | 33.3       | 86          | gi 207619     |
| 52       | Chondroitin sulfate GalNAcT-2                                                                                                | 62.5       | 52          | gi 31560032   |
|          | Unnamed protein product                                                                                                      | 32.6       | 113         | gi 74182195   |
|          | ATP synthase, H+ transporting, mitochondrial F1 complex, alpha subunit, isoform 1                                            | 59.7       | 97          | gi 6680748    |
| 53       | Unnamed protein product                                                                                                      | 27.3       | 91          | gi 12832367   |
|          | Electron transferring flavoprotein, beta polypeptide                                                                         | 27.6       | 90          | gi 38142460   |

|    |                                                                                                              |      |     |              |
|----|--------------------------------------------------------------------------------------------------------------|------|-----|--------------|
| 54 | Stress-70 protein (PBP74/CSA)                                                                                | 73.4 | 195 | gi: 903309   |
| 55 | Heat shock 70-kDa protein 5 (glucose-regulated protein)                                                      | 72.4 | 143 | gi: 31981722 |
| 56 | Unnamed protein product                                                                                      | 56.6 | 151 | gi: 74203945 |
| 57 | Prolyl 4-hydroxylase, beta polypeptide                                                                       | 57.0 | 150 | gi: 42415475 |
|    | Unnamed protein product ( <i>R. norvegicus</i> )                                                             | 57.9 | 151 | gi: 13344284 |
|    | Unnamed protein product                                                                                      | 58.8 | 150 | gi: 51452    |
|    | Hspd1 protein                                                                                                | 59.4 | 150 | gi: 76779273 |
| 58 | Ubiquinol-cytochrome <i>c</i> reductase complex core protein I, mitochondrial precursor                      | 52.7 | 98  | gi: 14548301 |
| 59 | Succinyl-CoA ligase (GDP-forming) beta-chain, mitochondrial precursor                                        | 46.8 | 144 | gi: 85681897 |
| 60 | Unidentified                                                                                                 | —    | —   | —            |
| 61 | Unidentified                                                                                                 | —    | —   | —            |
| 62 | Enoyl coenzyme A hydratase 1, peroxisomal                                                                    | 36.1 | 89  | gi: 7949037  |
| 63 | Unnamed protein product                                                                                      | 29.8 | 120 | gi: 74181431 |
|    | Prohibitin                                                                                                   | 29.8 | 119 | gi: 6679299  |
| 64 | Unidentified                                                                                                 | —    | —   | —            |
| 65 | Cytochrome <i>c</i> oxidase subunit 5A, mitochondrial precursor (cytochrome <i>c</i> oxidase polypeptide Va) | 16.0 | 84  | gi: 117099   |
| 66 | Unidentified                                                                                                 | —    | —   | —            |
| 67 | Aldehyde dehydrogenase 2, mitochondrial                                                                      | 56.5 | 91  | gi: 6753036  |
| 68 | Unnamed protein product                                                                                      | 46.3 | 101 | gi: 12857011 |
|    | Isovaleryl coenzyme A dehydrogenase                                                                          | 46.3 | 101 | gi: 9789985  |
| 69 | Unidentified                                                                                                 | —    | —   | —            |
| 70 | Unnamed protein product                                                                                      | 56.8 | 89  | gi: 21758044 |
|    | 3-Hydroxy-3-methylglutaryl-Coenzyme A synthase 2                                                             | 56.8 | 88  | gi: 31560689 |
| 71 | Adenylate kinase 2 isoform a ( <i>R. norvegicus</i> )                                                        | 26.4 | 93  | gi: 13591872 |
|    | Adenylate kinase 2 isoform b ( <i>R. norvegicus</i> )                                                        | 25.5 | 77  | gi: 77020256 |
|    | Unnamed protein product                                                                                      | 25.6 | 46  | gi: 74207742 |
|    | Adenylate kinase 2 isoform b                                                                                 | 25.6 | 45  | gi: 34328230 |
| 72 | Unidentified                                                                                                 | —    | —   | —            |
| 73 | Aldolase 2, B isoform                                                                                        | 39.5 | 91  | gi: 21450291 |
| 74 | Unnamed protein product                                                                                      | 42.0 | 85  | gi: 74137706 |
|    | 3-Ketoacyl-CoA thiolase B                                                                                    | 44.0 | 84  | gi: 22122797 |
| 75 | Unidentified                                                                                                 | —    | —   | —            |
| 76 | Unidentified                                                                                                 | —    | —   | —            |
| 77 | Unidentified                                                                                                 | —    | —   | —            |
| 78 | Unidentified                                                                                                 | —    | —   | —            |
| 79 | Unidentified                                                                                                 | —    | —   | —            |

Spot no. is the same as that used to identify proteins in the gel shown in Supplementary Figure S1. These numbers are not to be confused with the numbering system used within the main body of the manuscript. Mass is measured in kDa. The MOWSE score is an algorithmic calculation used to assign a statistical weight to each peptide match; therefore, a higher MOWSE score implies a higher statistical likelihood of the match being correct. The accession number is the unique NCBI label given to proteins.
